# Supplementary material for: Normalization and centering of array-based heterologous genome hybridization based on divergent control probes
Source: Springer Nature journal article supplement (doi:10.1186/1471-2105-12-183), 2011-05-21

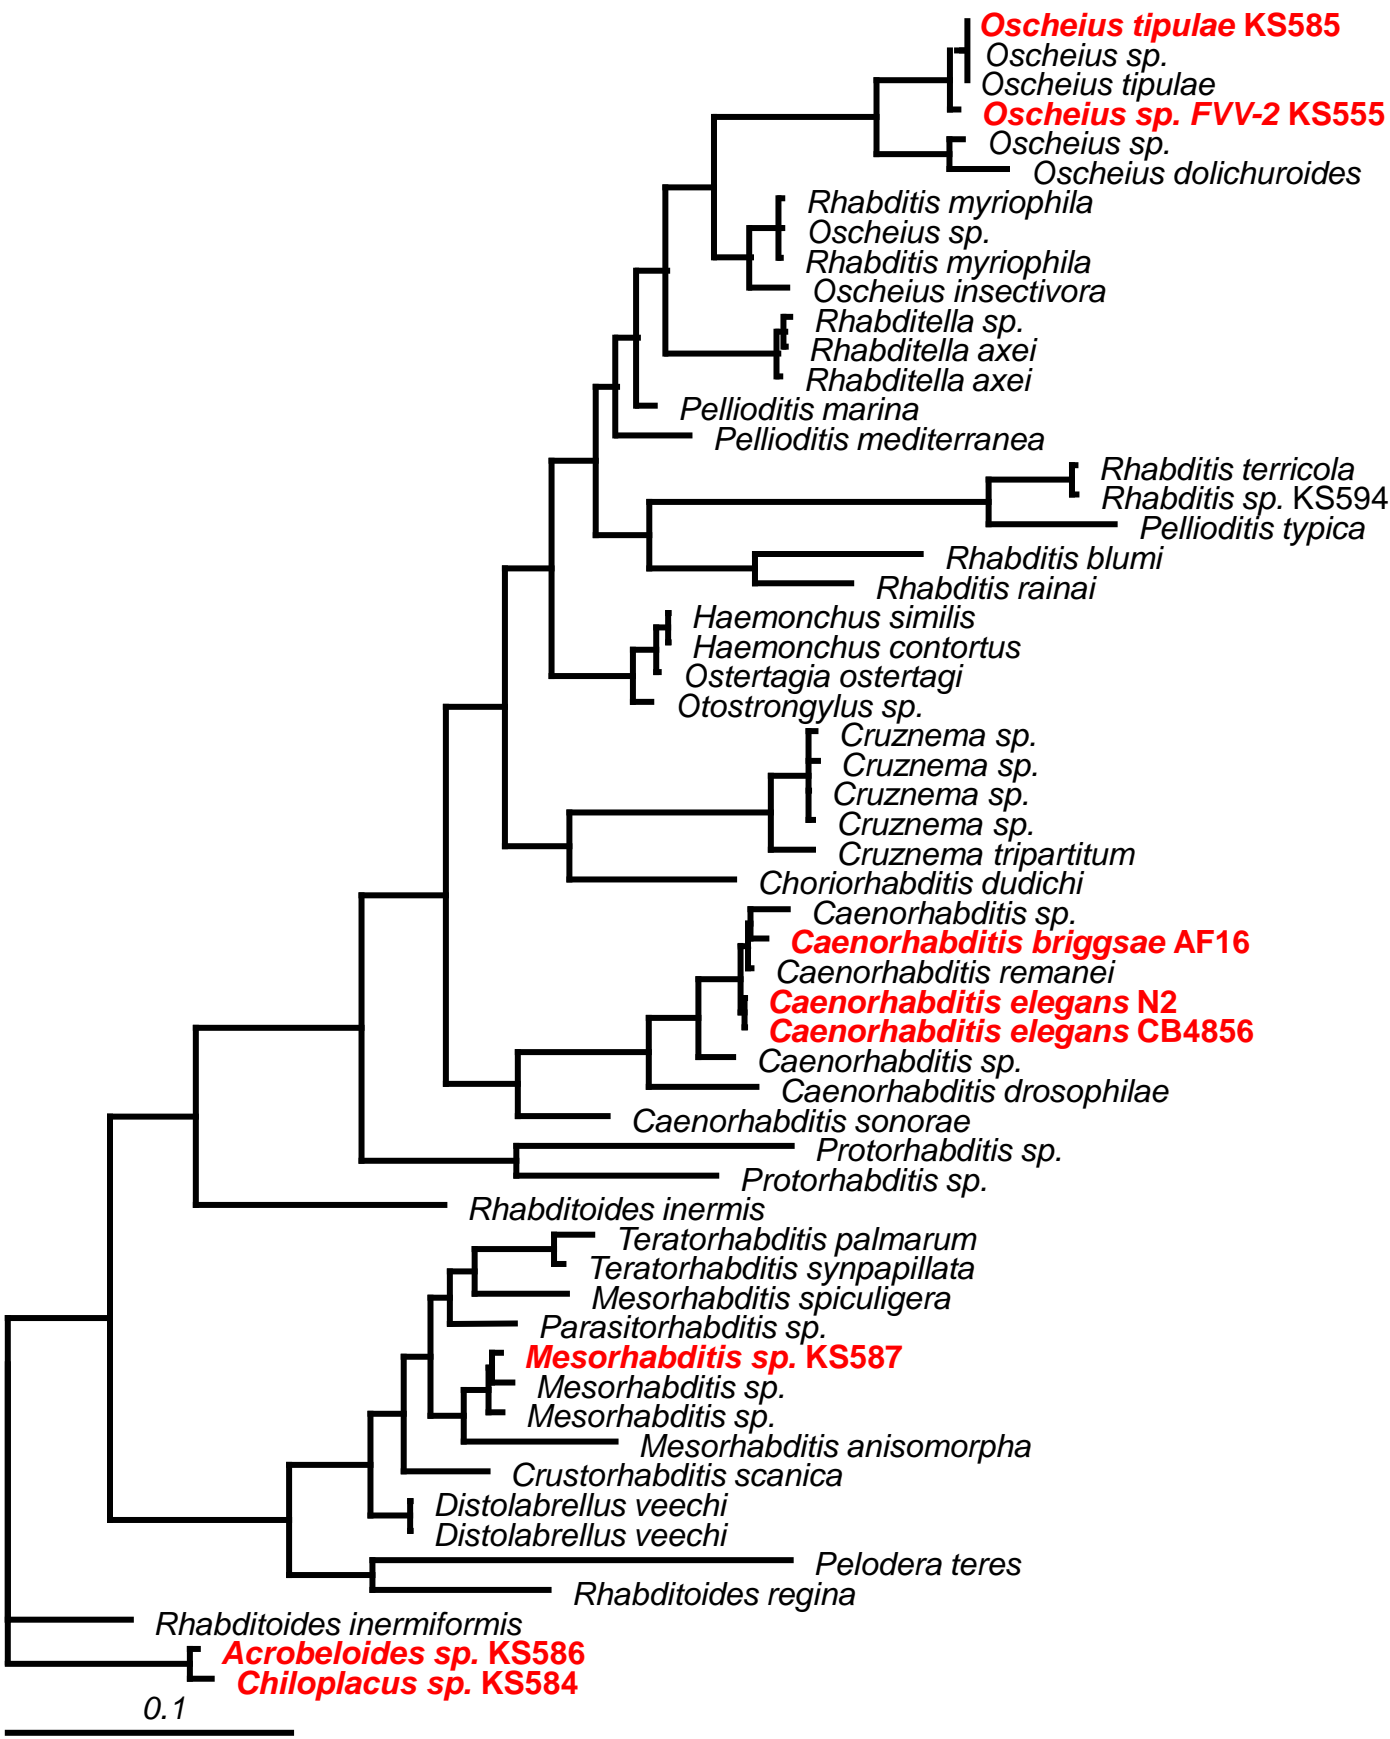

Supplement: 12859_2010_4597_MOESM1_ESM.pdf [file 12859_2010_4597_MOESM1_ESM.pdf]
