# Supplementary material for: Normalization and centering of array-based heterologous genome hybridization based on divergent control probes
Source: Springer Nature journal article supplement (doi:10.1186/1471-2105-12-183), 2011-05-21

*Caenorhabditis elegans* N2

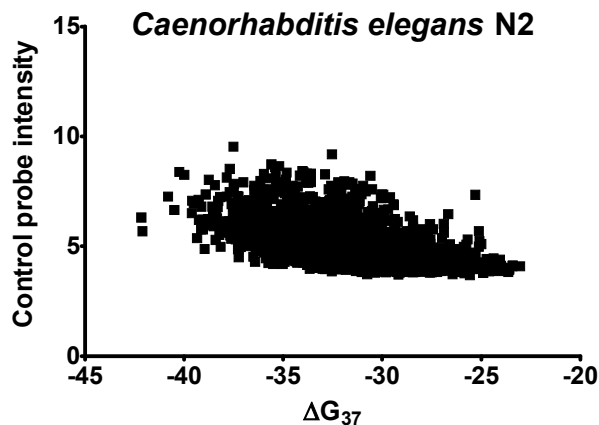

*Caenorhabditis elegans* CB4856

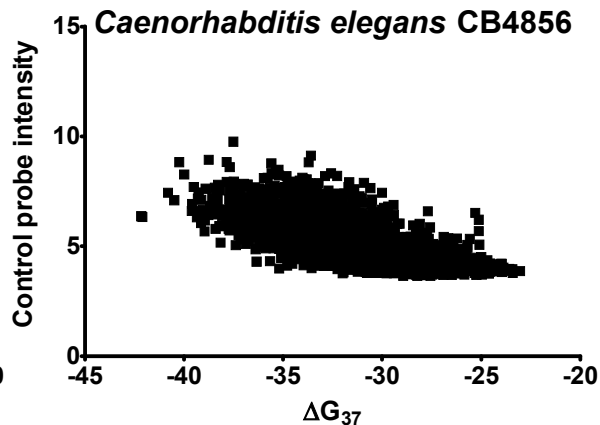

*C. briggsae* AF16

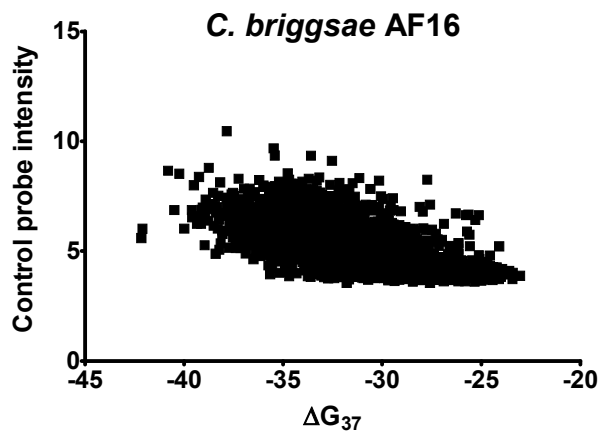

*Mesorhabditis* sp. KS587

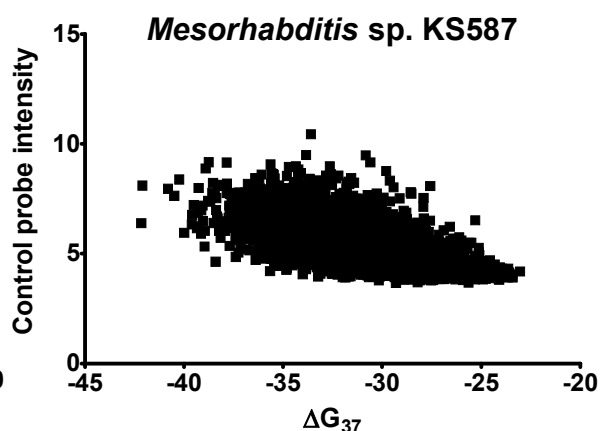

*Oscheius tipulae* KS585

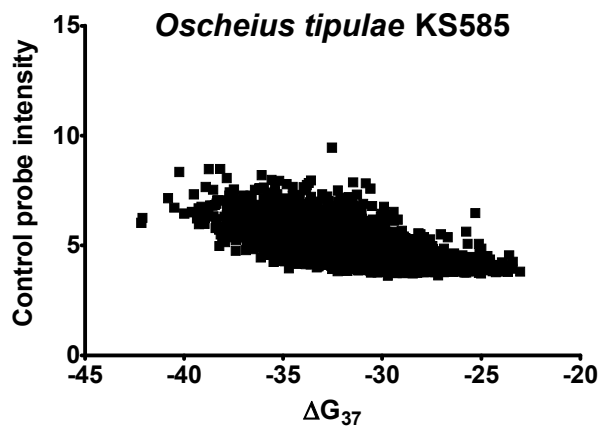

*Oscheius* sp. FVV-2 KS555

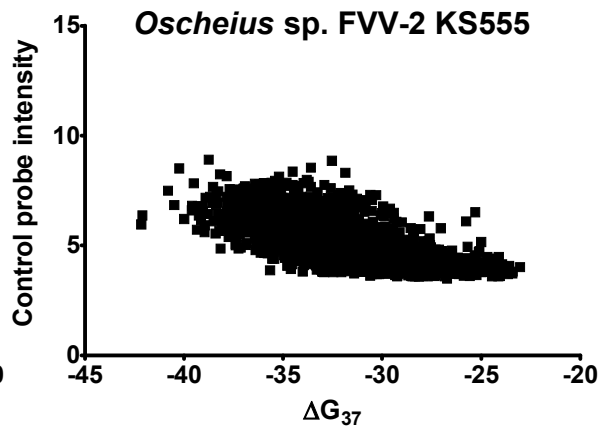

*Acrobeloides* sp. KS586

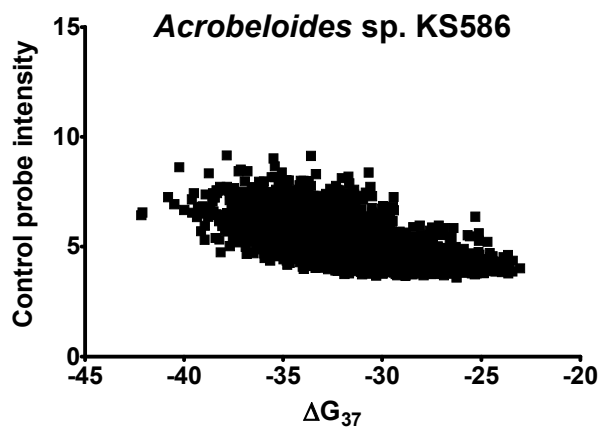

*Chiloplacus* sp. KS584

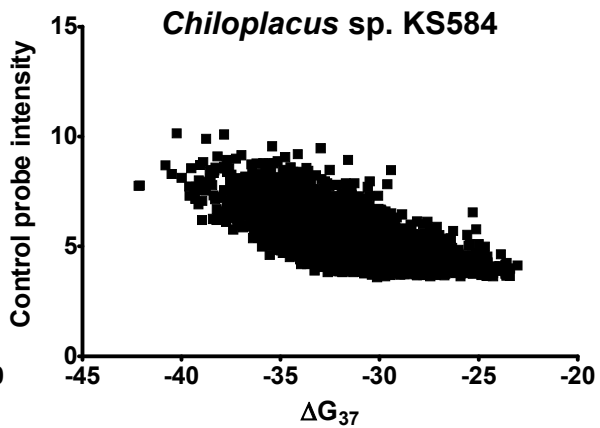

Supplement: 12859_2010_4597_MOESM3_ESM.pdf [file 12859_2010_4597_MOESM3_ESM.pdf]
